# Supplementary material for: Sex/gender considerations in school-based interventions to promote children’s and adolescents’ physical activity
Source: Springer Nature journal article supplement (doi:10.1007/s12662-021-00724-8), 2021-06-18
Supplement: MOESM5 [file 19273456]

|                             |                     | Item of sex/gender checklist                   |        |        |     |        |     |        |     |        |        | Sum of ratings |       |         |      |   |
|-----------------------------|---------------------|------------------------------------------------|--------|--------|-----|--------|-----|--------|-----|--------|--------|----------------|-------|---------|------|---|
| Author, year of publication | Intervention effect | 1                                              | 2      | 3      | 4   | 5      | 6   | 7      | 8   | 9      | 10     | detailed       | basic | no info | poor |   |
| Aburto, N. J.               | 2011                | Significant positive effect for girls and boys | Blue   | Red    | Red | Red    | Red | Red    | Red | Yellow | Green  | Red            | 1     | 1       | 7    | 1 |
| Bartholomew, J. B.          | 2018                | Significant positive effect for girls and boys | Yellow | Yellow | Red | Red    | Red | Red    | Red | Red    | Yellow | Green          | 1     | 3       | 6    | 0 |
| Blaas, A.                   | 2013                | Significant positive effect for girls and boys | Blue   | Red    | Red | Red    | Red | Red    | Red | Green  | Green  | Green          | 3     | 0       | 6    | 1 |
| Butcher, Z.                 | 2007                | Significant positive effect for girls and boys | Blue   | Red    | Red | Red    | Red | Red    | Red | Yellow | Green  | Yellow         | 1     | 2       | 6    | 1 |
| Carson, R. L.               | 2014                | Significant positive effect for girls and boys | Yellow | Red    | Red | Red    | Red | Red    | Red | Yellow | Green  | Red            | 1     | 2       | 7    | 0 |
| Chase, B.                   | 2018                | Significant positive effect for girls and boys | Yellow | Red    | Red | Red    | Red | Red    | Red | Yellow | Green  | Yellow         | 0     | 3       | 7    | 0 |
| Cronholm, F.                | 2017                | Significant positive effect for girls and boys | Yellow | Yellow | Red | Red    | Red | Red    | Red | Green  | Green  | Yellow         | 2     | 3       | 5    | 0 |
| de Barros, M. V.            | 2009                | Significant positive effect for girls and boys | Blue   | Red    | Red | Red    | Red | Red    | Red | Yellow | Green  | Red            | 1     | 1       | 7    | 1 |
| Efrat, M. W.                | 2013                | Significant positive effect for girls and boys | Blue   | Yellow | Red | Red    | Red | Red    | Red | Yellow | Green  | Red            | 1     | 2       | 6    | 1 |
| Engelen, L.                 | 2013                | Significant positive effect for girls and boys | Yellow | Red    | Red | Red    | Red | Yellow | Red | Yellow | Green  | Red            | 1     | 3       | 6    | 0 |
| Erwin, H. E.                | 2011                | Significant positive effect for girls and boys | Yellow | Red    | Red | Red    | Red | Red    | Red | Yellow | Green  | Green          | 2     | 2       | 6    | 0 |
| Haerens, L.                 | 2007-1              | Significant positive effect for girls and boys | Yellow | Yellow | Red | Red    | Red | Red    | Red | Green  | Green  | Green          | 3     | 2       | 5    | 0 |
| Haerens, L.                 | 2007-2              | Significant positive effect for girls and boys | Yellow | Yellow | Red | Red    | Red | Red    | Red | Yellow | Green  | Red            | 1     | 3       | 6    | 0 |
| Janssen, M.                 | 2015                | Significant positive effect for girls and boys | Yellow | Yellow | Red | Red    | Red | Red    | Red | Yellow | Green  | Green          | 2     | 3       | 5    | 0 |
| Magnusson, K. T.            | 2011                | Significant positive effect for girls and boys | Blue   | Red    | Red | Yellow | Red | Red    | Red | Green  | Green  | Yellow         | 2     | 2       | 5    | 1 |
| Martin, R.                  | 2017                | Significant positive effect for girls and boys | Blue   | Red    | Red | Yellow | Red | Red    | Red | Red    | Green  | Green          | 2     | 1       | 6    | 1 |
| Mayfield, C. A.             | 2017                | Significant positive effect for girls and boys | Yellow | Yellow | Red | Red    | Red | Red    | Red | Yellow | Green  | Yellow         | 1     | 3       | 6    | 0 |
| Mendez-Gimenez, A.          | 2017                | Significant positive effect for girls and boys | Blue   | Red    | Red | Red    | Red | Red    | Red | Yellow | Green  | Yellow         | 1     | 2       | 6    | 1 |
| Miller, A.                  | 2016                | Significant positive effect for girls and boys | Yellow | Red    | Red | Red    | Red | Red    | Red | Yellow | Green  | Red            | 1     | 2       | 7    | 0 |
| Murthag, E.                 | 2013                | Significant positive effect for girls and boys | Yellow | Red    | Red | Red    | Red | Red    | Red | Yellow | Green  | Yellow         | 1     | 3       | 6    | 0 |
| Reznik, M.                  | 2015                | Significant positive effect for girls and boys | Blue   | Red    | Red | Red    | Red | Red    | Red | Yellow | Green  | Yellow         | 1     | 2       | 6    | 1 |
